# Supplementary material for: Chromosomal organization and evolutionary history of Mariner transposable elements in Scarabaeinae coleopterans
Source: PubMed Central journal article supplement (PMC3906913; doi:10.1186/1755-8166-6-54), 2013-11-29
Supplement: 1755-8166-6-54-S2.pdf [file 1755-8166-6-54-S2.pdf]

**Additional File 2: Dataset S1 - Sequence alignment of related *Mariner* families of diverse organisms retrieved from public databases and sequences obtained in the present work. The abbreviations correspond to species names and IDs as described in the caption of Figure 2. Dashes represent indels.**

```

Hs (Mariner-24_SIn)    AAACAACCTCGAAGGCGGGATTGCATCCGAAGAAAATAAT-----GCTCTCCGTATGGT
Hs (Mariner-45_HSal)  AGTCTGTGGCAAAGGCCACACTGACGCCCAGGAAGGTTAT-----GCTGTGTGTTTGGT
Cf (Mariner-6_CFl)    TAACCACTTCGAAGGCAGGCTTACATCCGAAAAAGGTAAT-----GCTCTGCATTTGGT
Hs (Mariner-35_HSal)  AAACCACACCGAAGCAAACATCCATACGAAAAAAGTCAT-----GCTGTGTATTTGGT
Df (Mariner-1-DF)     AAGCCACATCAAAGGCCGATATCCATCAGAGGAAAGTTAT-----GCTGTCTGTTTGGT
Ac (Mariner-1_Ace)    AAAGGCAAGCAAAGGCCGAGATCCACCAAAAGAAGGTAAT-----GCTGTCAATGTGGT
Lh (ADOQ01008024)    A AAGGCAAGCAAAGGCCGACATCCACCAAAAGAAGGTGAT-----GCTGTCAATCTGGT
Lh (ADOQ01001582)    ----CACCGAAAAGGCCGACATCCACCAAAAGAAGGTGAT-----GCTGTCAATCTGGT
Dm (JX976930)        -----TATCAAAGCTGGTATTCATCATAGGAAGTTTAT-----GCTCTCAGTGTGGT
Dm (JX976937)        -----TATCAAAGCTGATATTCATCATAGGAAGTTTAT-----GCTCTCAGTGTGGT
Dm (JX976938)        -----AAAGCTGATATTCATCATAGAAAGTTTAA-----GCTCTCACTGTGGT
Ce (JX976929)        -----AAAGCTGGTATTCATCATAGAAAGTTTAT-----GCTCTCACTGTGGT
Dm (jx976934)        -----TATCAAAGCTGGTATTCATCATAGAAAGTTTAT-----GCTCTCACTGTGGT
Ce (JX976928)        -----TATCAAAGCTGATATTCATCATAGTAAGTTTAT-----GCTCTCACTGTGGT
Dm (JX976936)        -----AAAGCTGATATTCATCATAGAAAGTTTAT-----GCTCTCACTGTGGT
Mr (AFJA01006902)    AAACGAGATCGAAACCAGAGATCCACCAGAGGTAGATTAT-----GCTCTCTGTGTGGT
Mr (AFJA01006736)    AAACGAGATCGAAACCAGAGATCCACCAGGAAGGTAAT-----GCTCTCTGTGTGGT
Dm (JX976932)        -----AAAGCTGGTATTCATCAGAAGAAGGTTTAT-----GCTCACAGTGTAGT
Dm (JX976933)        -----TATCAAAGCTGGTATTCATCAGAAGAAGGTTTAT-----GCTCACAGTGTAGT
Si (AEAQ01010279)    ---CGACATCAAAGCAAACATTCATCAGAGAAAAATTATGTTGTGGCTCTCAGTGTGGT
Si (AEAQ01009575)    ---CGACATCAAAGCAAACATTCATCAGAGAAAAATTATGTTGTGGCTCTCAGTGTGGT
Cf (AEAB01001421)    ---CAACTTCAAAGCAGAACATTCATCAGAGGAAGATTAT-----GCTCTCAGTGTGGT
Cf (AEAB01018477)    ---CAACTTCAAAGCAGAACATTCATCAGAGGAAGATTAT-----GCTCTCAGTGTGGT
Ee (EEu_Mariner_Tbel) AAATGACATCGAAAGCAGACA TTCATCAGAGGAAGGTTAT-----GCTCTCAGTGTGGT
Pb (PBa_Mariner_Tbel) AAACGACATCAAAGCAAACATTCATCAGAGGAAGGTTAT-----GCTCTCAGTGTGGT
Tb (Mariner_Tbel)     AAACGACATCGAAAGCAGACATTCATCAGAGGAAGGTTAT-----GCTCTCAGTGTGGT
Hs (HSal_Mariner_Tbel) AAACGACA TCGAAAGCAGACATTCATCAGAGGAAGGTTAT-----GCTCTCAGTGTGGT
Hs (Mariner-22_HSal)  AAACCACTTCGAAGGCAGGGCTTCCACCCGAGCAAGATCAT-----GCTCTCAATTTGGT
Ae (Mariner-16_AEc)   AAGCAATCGCAAACCTGGATTGACGACGAAGAAGGTGAT-----GTTGTGTGTGTGGT
Ae (AEc_Mariner-8_SIn) AAACGACTTCAAAGCCTGGATTGATGGCAAATAAGGTGAT-----GCTGTGTGTATGGT
Si (Mariner-8_SIn)    AAACGACTTCAAAGCCTGATTTGACGACAAATAAGGTGAT-----GCTGTGTGTATGGT
Bte (Mariner-1_Bte)   AGACGACACCAAAGCTGAGATTCACCA -AAAAAGATTAT-----GCTGTCAAGTTTGGT
Am (AMe_FAMAR1)       AAACAACATCAAAGCTGGTATTCATCAAAGAAGGTTTT-----GTTATCAGTTTGGT
Fa (FAMAR1)           AAACAACATCAAAGCTGGTATTCATCAAAGAAGGTTTT-----GTTATCAGTTTGGT
Hs (Mariner-2_HSal)   AAACAACATCAAAGCTGATATTCATCAAAGAAGGTTAT-----GTTATCAGTTTGGT
Hs (Mariner-42_HSal)  AAACCGTATCGAAAGCTGAATTGCATCAAAAAAAGATCAT-----GCTGTCAATTTGGT
Ac (Mariner-13_Ace)   AAACCTCATCGAAAGCCGAACTGCATCAAAAAAAGATAAT-----GCTGTCAATTTGGT
Ae (AEVX01012963)    AAACCTCATCGAAAGCTGAACCTGCATCAAAAAAAGATAAT-----GCTGTCAATTTGGT
Cc_4                  -----AAAAGCTGGTATTCATCA-AAAAAGATCAT-----GCTGTCAATTTGGT
Cc_6                  ----TATCTCAAAGCTGATATTCATCA-AAAAAGATCAT-----GTTGTCAATTTGGT
Cc_5                  -----AAAAGCTGGTATTCATCA-AAAAAGATCAT-----GTTGTCAATTTGGT
Cc_7                  -----AAAAGCTGGTATTCATCA-AAAAAGATCAT-----GTTGTCAATTTGGT
Cc (JX976920)         ---TATCATCAAAGCTGATATTCATCA-AAAAGGATCAT-----GCTATCAGTTTGGT
Cc (JX976921)         -----AAAAGCTGGTATTCATCA-AAAAGGATCAT-----GCTATCAGTTTGGT
Cc (JX976922)         ---TATCATCAAAGCTGGTATTCATCA-AAAAGGATCAT-----GCTATCAGTTTGGT
Cc (JX976923)         -----AAAAGCTGGTATTCATCA-AAAAGGATCAT-----GCTATCAGTTTGGT
Dm (JX976931)         -----AAAAGCTGGTATTCATCATA--AAGGTCAT-----GCTCTCAATTTGGT
Ce (JX976927)         AAA-----G AAGTGCATATTCATCA-AAAAAGATCAT-----GCTGTCAATTTGGT
Dm (JX976935)         ---TATCAAAAAAAGCTGATATTCATCA-AAAAAGATCAT-----GCTGTCAATTTGGT
Ce (JX976926)         -----AAAAGCTGATATTCATCA-AAAAAGATCAT-----GCTGTCAATTTGGT
Ce (JX976924)         AAA-----AAAAGCTGATATTCATCA-AAAAAGGTCAT-----GCTGTCAATTTGGT
Ce (JX976925)         -----AAAAGCTGATATTCATCA-AAAAAGGTCAT-----GCTGTCAATTTGGT
Hs (Mariner-36_HSal)  AAAGCACTTCTAAAGCAGAC ATTCACCAAAGG AAGATTTT-----GCTATCTGTTTGGT
Hs (Mariner-23_HSal)  AAAGCACATCAAAGCAGACATCCACCAGAGAAAGGTGAT-----GCTCTCAATCTGGT
Pb (PBa_Mariner-23_HSal) AAAGCACATCAAAGCAAACATCCACCAGAGGAAGGTGAT-----GCTCTCAATCTGAT
Ca (Mariner_CA)       AAACCACTTCAAAGGCTGATATCCACCAAAAGAAGGTTAT-----GCTGTCTGTTTGGT
Si (Mariner-24_SIn)   AAAGCACTTTCGAAGGCCGATATTCATCAAAAAAAGGTGAT-----GCTATCTGTTTGGT
Sm (SMAR7)            AATCCACTTTCGAAGGCCGATATTCACCAAAAAAAGGTTAT-----GCTATC TGTTTGGT
Af (Mariner-1_AFl)    AAAGCACTTTCGAAGCCAAACATT CACCAAAAAAAGGTGAT-----GCTCTCTGTTTGGT
Hs (Mariner-11_HSal)  AAAGCACATCGAAAGCTGATATTCATCAAAAAAAGAGGTGAT-----GCTCTCTGTTTGGT
Hs (Mariner-16_HSal)  AGACGGTCGCAAAGCTGGATTA CACCCGAAGAAGGTCAT-----GCTCTGTATCTGGT

```

Der (Mariner-2\_DER) AAACAGTGGCCAAGCCGGGATTGACGGCCAGGAAGGTTTT-----GCTGTGTGTTTGGT  
Hs (Mariner-26\_HSal) AAACGATCGCCAAGCCCGGATTAACGGCCAAAGAAGGTTTT-----ACTGTGTGTTTGGT  
Del (Mariner-2\_DEL) AGGCGGTGGCTAAGCCAGGATTGACGGCCAGAAAGGTTTT-----GCTGTGTGTTTGGT  
Del (Mariner-1\_DEL) AGACGGTGGCCAAAGCCTGGATTGACGGCCAGGAAGGTTCT-----TCTGTGTGTTTGGT  
Bt (Mariner-1\_BT) CAACCACACCCAAGCCGGTCTTCATCCAAAGAAGGTGAT-----TGTTGTATATGGT  
Ac (Mariner-5\_ACe) TAGCCACCCCAAAAGCCGGTCTTCATCCAAAGAAGGTGAT-----GCTCTGTGTCTGGT  
Si (Mariner-28\_SIn) TGAC CACTCCAAAGCCTGGGCTTCATCCGGAGAAGATCAT-----GCTGTGTATTTGAT  
\* \* \* \* \*

Hs (Mariner-24\_SIn) GGGATTTCAAGGGTG--TCATCTATTACGAAC TGTACCGTCAGGCCAAAACGATTGATTC  
Hs (Mariner-45\_HSal) GGGATTGGAAGGGCA--TCGTGCATCACGAGCTGCTGCCGCCAGGCAGAACGATAGACTC  
Cf (Mariner-6\_CFl) GGAATTGGAAGGGGA--TAGTATATTATGAGCTACTACCGGACAACGAAACCATCGATTC  
Hs (Mariner -35\_HSal) GGGATTGGAAGGAA--TCGTGTA CTACGAGCTGCTTCCGCAAAACCAACAATTGATTC  
Df (Mariner-1-DF) GGAATTGGAAGGGTG--TAGTGCAC TTTGAGCTGCTGGGACGGAATGAAACCATCAATTC  
Ac (Mariner-1\_ACe) GGGATTGGAAGGGAC--CAGTCTTCTATGAGCTACTTCCAAAGAACAACGATTAATTC  
Lh (ADOQ01008024) GGGATTGGAAGGGAC--CAGTCTTCTATGAGCTGCTTCCAAAGAATAAAACGATTAATTC  
Lh (ADOQ01001582) GGGATTGGAAGGGAC--CAGTCTTCTATGAGCTGCTTCCAAAGAATAAAACGATTAATTC  
Dm (JX976930) AGG-----GTG--CTATGCTTTTCGAAC TCTACTAGGGA ACCAAAGAATCAATTC  
Dm (JX976937) AGG-----GTG--CTATGCTTTTCGAAC TCTACTAGGGAACC AAAGAATCAATTC  
Dm (JX976938) GGA-----GTG--CCATGCTTTTCGAAT TCCACTAAGGAACCAAAGAATCAATTC  
Ce (JX976929) GGA-----GTG--CCATGCTTTTCGAAT TCCACTAAGGAACCAAAGAATCAATTC  
Dm (JX976934) GGA-----GTG--CCATGCTTTTCGAAT TCCACTAAGGAACCAAAGAATCAATTC  
Ce (JX976928) GGA-----GTG--CCATGCTTTTCGAAT TCCACTAAGGAACCAAAGAATCAATTC  
Dm (JX976936) GGA-----GTG--CCATGCTTTTCGAAT TCCACTAAGGAACCAAAGAATCAATTC  
Mr (AFJA01006902) GGGATTTCAAAGGCA--CAGTGT TTTTCGAAC TCTTATCAAGAAATCAAACGATCAATTC  
Mr (AFJA01006736) GGGATTTGAAAGGCA--TAGTGT TTTTTCGAAT TCTATCAAGAAATCAAACGATCAATTC  
Dm (JX976932) GGGATTTTAAAGGTG--ACATGT TTTTCAAGT TCTGCCAAGAAACCAAACATCAATTA  
Dm (JX976933) GGGATTTTAAAGGTG--ACATGT TTTTCAAGT TCTGCCAAGAAACCAAACATCAATTA  
Si (AEAQ01010279) GAGATGTT AAAGGTA--TCGTGT TTTCTCGAGCTCCTACCAAGGAACCAAACAATCAATTC  
Si (AEAQ01009575) GGAATTTTAAAGGTG--TCGTGT TTTTTCGAGCTCCCACCAAGAAACCAAATAATCAATTC  
Cf (AEAB01001421) GGGATTGGAAGGGTG--TG GTGTTTTTTTGAGCCCTACCAAGGAACCGAACATCAATTC  
Cf (AEAB01018477) GGGATTGGAAGGGTG--TG GTGTTTTTTTGAGCCCTACCAAGGAACCGAACATCAATTC  
Ee (EEu\_Mariner\_Tbel) GGGATTTTAAAGGCA--TT-----TTT TGAGCTCCTACCAAGGAACCAAACAATCAATTC  
Pb (PBa\_Mariner\_Tbel) GGGATTTTAAAGGTG--TCGTGT TTTTTCGAGCTCCTACCAAGGAACCAAACAATCAATTC  
Tb (Mariner\_Tbel) GGGATTTTAAAGGTG--TCGTGT TTTTTCGAGCTCCTACCAAGGAACCAAACAATCAATTC  
Hs (HSal\_Mariner\_Tbel) GGGATTTTAAAGGTG--TCGTGT TTTTTCGAGCTCCTACCAAGGAACCAAACAATCAATTC  
Hs (Mariner-22\_HSal) GGGATTGGAAGGGTG--TTGTGT TCTACGAGCTACTTCCGAAGAACAGAACGATCAATTC  
Ae (Mariner-16\_AEc) GGGATTGGAAGGGAA--TCGTTCACTATGAGCTGTTATCGCCGATCAAACAATTAATTC  
Ae (AEc\_Mariner-8\_SIn) GGGATTGGAAGGGAG--TCGTCCATCATGAGGTGTTACCACATGGCCTAACGATTAATTC  
Si (Mariner-8\_SIn) GGGATTGGAAGGGAG--TCGTCCATCATGAGGTGTTACCACATGGCCTAACGATTAATTC  
Bte (Mariner-1\_Bte) GGGATTATAAAGGAA--TTCTGTACTTTGAACTTTTACCAAGAAACCAAACGATTAATTC  
Am (AMe\_FAMAR1) GGGATTACAAAGGAA--TTGTCTATTTTGAAC TCTTACCACCCAACCGAACGATCAATTC  
Fa (FAMAR1) GGGATTACAAAGGAA--TTGTCTACTTTGAACTCTTACCACCCAACCGAACGATCAATTC  
Hs (Mariner-2\_HSal) GGGATTACAAAGGAA--TTGTCTACTTTGAAATTTTACCACCGCAACCAAACAATCAATTC  
Hs (Mariner-42\_HSal) GGGATTACAAAGGTG--TTGTGTATTTT GAGATGCTTCCAAGCAACCAAACGATCAACTC  
Ac (Mariner-13\_ACe) GGGATTTCAAAGGTG--TTGTGTATTTT GAGCTGCTTCCAAGGAATCAAACGATTAATTC  
Ae (AEVX01012963) GGGATTTCAAAGGTG--TTGTGTATTTT GAGCTGCTTCCAAGGAATCAAACGATTAATTC  
Cc\_4 GGGATTACAAAGGTG--TTGTGTATTT CGGACTGTTTCCAAGGAATCAGACC-----  
Cc\_6 GGGATTACAAAGGTG--TTGTGTATTT CGGACTGTTTCCAAGGAATCAGACC-----  
Cc\_5 GGGATTACAAAG GTG--TTGTGTATTT CGATCGGTTTCCAAGGAATCAGACC-----  
Cc\_7 GGGATTACAAAGGGTG--TTGTGTATTT CGGACTGTTTCCAAGGAATCAGACC-----  
Cc (JX976920) GGAATTACAAACGTA--TTGTGTATTTT GAGCTATTTCCAGGAACCGACGATCAATTC  
Cc (JX976921) GGAATTACAAACGTA--TTGTGTATTTT GGTGCTATTTCCAGGAACCGACGATCAATTC  
Cc (JX976922) GGAATTACAAACGTA--TTGTGTATTTT GAGCTATTTCCAGGAACCGACGATCAATTC  
Cc (JX976923) GGAATTACAAACGTA--TTGTGTATTTT GAGCTATTTCCAGGAACCGACGATCAATTC  
Dm (JX976931) GGAA-----TTTTGAGCTTCTTCCAAGGGAGCAGA--ATAAATTT  
Ce (JX976927) GGAATTACAAAGGCT--GTGTGCATTTT GAGTTGCCCTCCAAGGAACCGACAATCAATTC  
Dm (JX976935) GGAATTACAAAGGCT--GTGTGCATTTT GAGTTGCCCTCCAAGGAACCGACAATCAATTC  
Ce (JX976926) GGAATTACAAAGGCT--GTGTGCATTTT GAGTTGCCCTCCAAGGAACCGACAATCAATTC  
Ce (JX976924) GGAATTACAAAGGCT--GTGTGCATTTT GAGTTGCCCTCCAAGGAACCGACAATCAATTC  
Ce (JX976925) GGAATTACAAAGGCT--GTGTGCATTTT GAGTTGCCCTCCAAGGAACCGACAATCAATTC  
Hs (Mariner-36\_HSal) GGGATTACAAAGGGTA--TTGTGT TTTT TGAAC TGTAAACGTAATCAACGATTGATTC  
Hs (Mariner-23\_HSal) GGGATTGGAAGGGTG--TG GTGTTTTTTCGAGCTCTTACCAGGAATGTTACGATCAATTC  
Pb (PBa\_Mariner-23\_HSal) GGGATTGGAAGGGTG--TG GTGTTTTTTCGAGCTCTTACCAGGAATGTTTTCGATCAATTC  
Ca (Mariner\_CA) GGGATTGGAAGGGTG--TG GTTATATTTT GAGCTGCTTCCAAGGAACCAAACGATTAATTC

Si (Mariner-24\_SIn) GGGATTTTCAAAGAAATCTTTTTTTTTTTTGGAGCTTCTACCGGACAACACAACGATCAATTC  
Sm (SMAR7) GGGATTTTCAAAGGGGA--TCGT-TTTTTTTGAGCTTCTACCGGACAATACCACGATTAATTC  
Af (Mariner-1\_AFl) GGGATTTTCAAAGGGAG--TTGTTTTTTTTTGGAGCTTCTACCTGACAATTGCACGATTAATTC  
Hs (Mariner-11\_HSal) GGGATTGGAAAGGAA--TGGTTTTTTTTTGGAGCTGCTACCAAAACAACAAACGATTGATTC  
Hs (Mariner-16\_HSal) GGGATTGGAAAGGAA--TCGTCTATTATGAGCTGCTGCCACCCAACAAAACGATTGATTC  
Der (Mariner-2\_DER) GGGATTGGAAAGGAA--TCATCCACTATGAGCTGCTCCCATATGGCCAGACGTTAATTC  
Hs (Mariner-26\_HSal) GGGATTGGAAAGGAA--TTATCTACTATGAGCTGCTCCCATATGGCCAAACACTTAATTC  
Del (Mariner-2\_DEl) GGGATTGGCAAGGAA--TTATCTACTATGAGCTGCTCCCATATGGCCAAACACTTAATTC  
Del (Mariner-1\_DEl) GGGATTGGCAGGGAA--TAATCCACTATGAGCTGCTCCCATATGGCCAAACGCTCAATTC  
Bt (Mariner-1\_BT) GGGATTGGAAAGGGAG--TCCTCTATTATGAGCTCCTTCCGGAAAACCAAACGATTAATTC  
Ac (Mariner-5\_ACe) GGGATTGGAAAGGGGA--TCCTGTATTATGAGCTTTTACCAAAACAACGAGACGATAAATTC  
Si (Mariner-28\_SIn) GGGACTGGAA--GGTG--TCGTGTA TTATGAGCTCCTTCCAAAGAACGTACGGCTTAATTC

Hs (Mariner-24\_SIn) AACTGTATACTGTTTCGCAATTGACGAAAT---GAACCAAGCAATCCGCACAAAACG--  
Hs (Mariner-45\_HSal) GGACCTGTACTGTGCGACAATTAGCGCGATT---GCACCTAGCAATTCAAAAGAAAACG--  
Cf (Mariner-6\_CFl) GGACAAGTACTGTTTACAGTTGGATAAAT---GAAGATAGAAATCGCCAAAAGTG--  
Hs (Mariner -35\_HSal) CAACAAGTATTGTTCCCAATTGGACTGTTT---GAAGGCAGCA ATCGATGAGAAGCG--  
Df (Mariner-1-DF) AGATGTGTACTGTGCGCCAGCTATCCAATTT---GGCGGAAAAAATTAAGAAAAGGA--  
Ac (Mariner-1\_ACe) CGATGTCTACTGTGAGCAGCTGCAGAAAT---AAGTGATGCCATCGCACAGAAAACG--  
Lh (ADOQ01008024) CGATGTCTCCTGTGAGCAGCTACAGAAAT---AAGTGATGCCATCGCACAGAAAACG--  
Lh (ADOQ01001582) CGATGTCTACTGTGAGCAGCTACAGAAAT---AAGTGATGCCATCGCACAGAAAACG--  
Dm (JX976930) AAATCCATACTGTTAACAATTT-----GAACGAATCCGTTACCTAGAAAAGG--  
Dm (JX976937) AAATCCATACTGTTAACAATTT-----GAACGAATCCGTTACCTAGAAAAGG--  
Dm (JX976938) AAATCTATACTGTTAACAATTT-----GAACGAATCTGTTATCAAGAAAAGG--  
Ce (JX976929) AAATCTATACTGTTAACAATTT-----GAACGAATCTGTTATCTAGAAAAGG--  
Dm (JX976934) AAATCTATACTGTTAACAATTT-----GAACGAATCTGTTATCTAGAAAAGG--  
Ce (JX976928) AAATCTATACTGTTAACAATTT-----GAACGAATCTGTTATCTAGAAAAGG--  
Dm (JX976936) AAATCTAT ACTGTTAACAATTT-----GAACGAATCTGTTATCTAGAAAAGG--  
Mr (AFJA01006902) TGACGTCTACTGCCGGCAATTAGAAAAGTTT---GAAAAGAATCAATTGAACAAAAACG--  
Mr (AFJA01006736) TGATATCTACTGCCGGTAATTAGAGAGTTT---GAAAAGAATCAATTGAACAAAAACG--  
Dm (JX976932) GAGTGTGTACTATCAGCAATTGGACAGTTTAAAAGAAAAGAATCCTACGTGCAGAAAACA--  
Dm (JX976933) GAGTGTGTACTATCAGCAATTGGACAGTTTAAAAGAAAAGAATCCTTTCGTGCAGAAAACA--  
Si (AEAQ01010279) AAACGTGTACTGTTGGCAATTGGACAGTTT---TAACGAATCTATCACCTAGAAAATG--  
Si (AEAQ01009575) GCGTATGTACTGTGCGCAATTGGACAATTT---AAACAAATCCATCATCCAGAAAACGTT  
Cf (AEAB01001421) GGATGTGTACTGTGCGCAATTGGACAGTTT---GAACGAATCTGTTCATCCAGAAAACG--  
Cf (AEAB01018477) GGATGTGTACTGTGCGCAATTGGACAGTTT---GAACGAATCTGTTCATCCAGAAAACG--  
Ee (EEu\_Mariner\_Tbel) AAATGTGTACTGTGCGCAATTGGACAGTTT---GAACGAATCCATCATCCAGAAAATG--  
Pb (PBa\_Mariner\_Tbel) GAATGTGTACTGTGCGCAATTGGACAGTTT---GAACGAATCCATCA TCCAGAAAACG--  
Tb (Mariner\_Tbel) GAATGTGTACTGTGCGCAATTGGACAGTTT---GAACGAATCCATCATCCAGAAAACG--  
Hs (HSal\_Mariner\_Tbel) GAATGTGTACTGTGCGCAATTGGACAGTTT---GAACGAATCCATCATCCAGAAAACG--  
Hs (Mariner-22\_HSal) AGATGTGTACTGTAGTCAGCTGGATAAAT---GAATGCAGCGATCCACGAGAAGCG--  
Ae (Mariner-16\_AEc) CGAACTCTACTGTGAACAAC TGGAGAGATT---ACAACAAGCAATTGAGAGGAAGCG--  
Ae (AEC\_Mariner-8\_Sln) AGAGCTCTACTGTTTCAACACTGGATAGATT---ACAGGAAGCGATTAAGGAAAAACG--  
Si (Mariner-8\_SIn) AGAGCTCTACTGTTTCAACACTGGATAGATT---ACAGGAAGCGATTAAGGAAAAACG--  
Bte (Mariner-1\_Bte) AAACGTGTACTGTTTCAACACTGCGCAAACT---GAGCGATGCAGTTCAAGAAAAGCG--  
Am (AMe\_FAMAR1) TGTTGTCTACATTGAACAAC TAAACGAAAT---AAACAATGCAGTTGAAGAAAAGCG--  
Fa (FAMAR1) TGTTGTCTACATTGAACAAC TAAACGAAAT---AAACAATGCAGTTGAAGAAAAGCG--  
Hs (Mariner-2\_HSal) AGATGTATACTTCAACAAC TAAACGAAAT---GAACAATGCAATTCAGAAAAGCG--  
Hs (Mariner-42\_HSal) AGATGTTTACTG CCAACAAC TATGAAAT---GGAGGAAGCAATCAAAGAGAAAAG--  
Ac (Mariner-13\_ACe) AGATGTCTACTGCCAACAAC TAAATGAAACT---GGAGGAAGCAATCAAAGAAAACG--  
Ae (AEVX01012963) AGATGTCTACTGCCAACAAC TAAATGAAACT---GGAGGAAGCAATTAAGAAAACG--  
Cc\_4 -----GGATGAAGCAATCAAAGAAAAGCT--  
Cc\_6 -----GGATGAAGCAATCAAAGAAAAGCT--  
Cc\_5 -----GGATGAAGCAATCAAAGAAAAGCT--  
Cc\_7 -----GGATGAAGCAATCAAAGAAAAGCT--  
Cc (JX976920) AGATCCTTATTGTTAACAAC TTAATGAAAT---GGATGAAGCAACCAAAGAAAAGCT--  
Cc (JX976921) AAATCCTTATTGTTAACAAC TTAATGAAAT---GGATGAAGCAACCAAAGAAAATA--  
Cc (JX976922) AAATCCTTATTGTTAACAAC TTAATGAAAT---GGATGAAGCAACCAAAGAAAATA--  
Cc (JX976923) AAATCCTTATTGTTAACAAC TTAATGAAAT---GGATGAAGCAACCAAAGAAAATA--  
Dm (JX976931) ATATGTTTTCTGTTAACAAC TTAATGAAACT---GGATGAAGTAATCAAAGAAAACG--  
Ce (JX976927) ACATGTTTACTGTCAACAAC TAAATAAACT---GAATGAAGCAATCAAAGAAAACG--  
Dm (JX976935) ACATGTTTACTGTCAACAAC TAAATAAACT---AAATGAAGCAATCAAAGAAAACG--  
Ce (JX976926) ACATGTTTACTGTCAACAAC TAAATAAACT---GAATGAAGCAATCAAAGAAAACG--  
Ce (JX976924) ACATGTTTACTGTCAACAAC TAAATAAACT---GAATGAAGCAATCAAAGAAAACG--

Ce (JX976925) ACATGTTTACTGTCAACAAC TAATAAAACT----GAATGAAGCAATCAAAGAAAAACG--  
Hs (Mariner-36\_HSal) GGAATTGTACTGTGTCGTC AATTGGACAAAATT----ACACGAAGCAATCAAAGCAGAAGCG--  
Hs (Mariner-23\_HSal) GGACGTGTACTGTCAACAGCTCGACAAAATT----GAACGAAGCAATAGCAGAAAAAGCG--  
Pb (Pba\_Mariner-23\_HSal) GGACGTGTACTGTCAACAGCTAGACAAAATT----GAACGAAGCAATAGCAGAAAAAGCG--  
Ca (Mariner\_CA) GGATGTTTACTGTCAACAAC TGGACAAAATT----GAATGCAGCAATCAAGCAGAAAAGCG--  
Sl (Mariner-24\_SIn) TGAAGTGTACTGTCAATCAGCTGGACAAAATT----GAATGATTCACTTAAACAGAAAAG--  
Sm (SMAR7) TGAA GTGTACTGTGATCAACTGGACAAAATT----GAATGATTCGCTCAAAACAGAAAAG--  
Af (Mariner-1\_AFl) GGAA GTGTACTGCAATCAATTGGACAAAATT----AAACGATTCCATCAAAACAAAAGAG--  
Hs (Mariner-11\_HSal) GAATGTGTATTGTCAATCAATTGGACAAAATT----GAATGATTCATCAAGCAGAAGAG--  
Hs (Mariner-16\_HSal) GACCAAGTACTGCTCACAAC TGGCCAAAATT----AAAGCGAGCAATCGATCAGAAGCG--  
Der (Mariner-2\_DER) TACCATCTACTGCGAACAACTGGACCGCTT----GAAGCAGGCGATCGACCAGAAGCG--  
Hs (Mariner-26\_HSal) GGACCTACACTGTCAACAAC TGCAGACTT----GAAGCAGGCGATCGACCAGAAGCG--  
Del (Mariner-2\_DEL) GGT TTTGTACTGTCAACAATTGGACCGCTT----GAAGGAAGCAATGCCCAGAAGCG--  
Del (Mariner-1\_DEL) GGACCTGTACTGCCAACAACTGGACCGCTT----GAAGGCAGCACTCATGCGAGAAGAG--  
Bt (Mariner-1\_BT) CAACAAGTACTGCTCCCAGTTAGACCAACT----GAAAGCAGCACTCGACGAAAAGCG--  
Ac (Mariner-5\_ACe) AGAGAAGTATTGTTCCCAATTAGACGAATT----GAAGACAGCAATGAAACAAAACG--  
Si (Mariner-28\_SIn) GGACAAGTACTGTGCCCAAT TGGACAAAATT----GAAGGAAGCCATTGCGAGAAAACG--

\*\*

Hs (Mariner-24\_SIn) ----TCCAGAATTGGCAAAT-CGCAAGGGTGTGCTCTTCCACCACGACAACGCCAGACCT  
Hs (Mariner-45\_HSal) ----GCCGGAACCTGGTCAAC-AGAAAAGGGTGTGCTATACCACGCTGACAACGCCAGACCG  
Cf (Mariner-6\_CFl) ----TCCGGAATTGATCAAT-AGGAAAAGGCGTCTGTTTTTCATCATGATAACGCCAGACCT  
Hs (Mariner-35\_HSal) ----TCCAGAATTGAGCAAAT-CGTTATGGTGTCAATTTCCACCAAGACAACGCTAGACCT  
Df (Mariner-1-DF) ----GCCGGCACTAGCTAAT-CGCAAGGGTATAGTCTTTCCACCATGACAACGCTAGGCC  
Ac (Mariner-1\_ACe) ----TCCCAGCTAATCAAT-CGTAAGGGTGTGGTGTTCACCACGACAATGCGAGACCA  
Lh (ADOQ01008024) ----TCCCAGCTAATCAAT-CGTAAGGGTGTGGTGTTCACCACGACAATGCGAGACCA  
Lh (ADOQ01001582) ----TCCCAGCTGATCAAT-CGTAAGGGTGTGGTGTTCACCACGACAATGTGAGACCA  
Dm (JX976930) ----TGCAAAGCACCTTAAT-AAGTTAGGATTGGCATTTCATCGCGGCAATGCAAGGCCA  
Dm (JX976937) ----TGCA AAGCACCTTAAT-AAGTTAGGATTGGCATTTCATCGCGGCAATGCAAGGCCA  
Dm (JX976938) ----TGCAAGACTTCTTAATAAGTAAAGGAGTGGCGTTTTCTGACGGCAATGCAAGGCCA  
Ce (JX976929) ----TGTAGAGCTTCTTAATAAGTAAAGGAGTGGCGTTTTCTGACGGCAATGCAAGGCCA  
Dm (JX976934) ----TGCAGAGCTTCTTAATAAGTAAAGGAGTGGCGTTTTCTGACGGCAATGCAAGGCCA  
Ce (JX976928) ----TGCAGAGCTTCTTAATAAGTAAAGGAGTGGCGTTTTCTGACGGCAATGCAAGGCCA  
Dm (JX976936) ----TGCAGAGCTTCTTAATAAGTAAAGGAGTGGCGTTTTCTGACGGCAATGCAAGGCCA  
Mr (AFJA01006902) ----CCCAGAACTAGCCAAC-CGTAAGGAGTGTGTTCCAACACGATAATGCGAGACCA  
Mr (AFJA01006736) ----CCCAGAACTGGCCAAT-CGTAAGGATTTATGTTCCACCCGATAATGCGAGACCA  
Dm (JX976932) ----TCCAGAGCTTGTTAAC-CATAAAGGAGTTGTATTTTCATCATGACAATGCAAGGCCA  
Dm (JX976933) ----TCCAGAGCTTGTTAAC-CATAAAGGAGTTGTATTTTCATCATGACAATGCAAGGCCA  
Si (AEAQ01010279) ----TATA-AATTCATTAAT-CGTAAGGAGTGTGTTCCATCAGCAC AACCGGTGACCA  
Si (AEAQ01009575) AATATCCAGAATTCGTTAAC-CATAAAGGAAGTGTGTTCCATCAGCAC AACCGGAGACCA  
Cf (AEAB01001421) ----TCCGGAGCTCGTCAAT-CGTAAGGAGTGTGTTCCATCAGCAC AACCGGAGACCA  
Cf (AEAB01018477) ----TCCGGAGCTCGTCAAT-CGTAAGGAGTGTGTTCCATCAGCAC AACCGGAGACCA  
Ee (EEu\_Mariner\_Tbel) ----TCCAGAGCTCGTTAAT-CGTAAGGAGTGTGTTCCATCATGACAACGCAAGACCA  
Pb (Pba\_Mariner\_Tbel) ----TCCAGAGCTCGTTAAT-CGTAAGGAGTGTGTTCCATCAGCAC AACCGGAGACCA  
Tb (Mariner\_Tbel) ----TCCAGAGCTCGTTGAT-CGTAAGGAGTGTGTTCCATCAGCAC AACCGGAGACCA  
Hs (HSal\_Mariner\_Tbel) ----TCCAGAGCTCGTTAAT-CGTAAGGAGTGTGTTCCATCAGCAC AACCGGAGACCA  
Hs (Mariner-22\_HSal) ----TCCAGAATTGGTGAAT-CGTAGAGGGCTGCTCTTCCATGACAACGCTAGGCCG  
Ae (Mariner-16\_AEc) ----GCCAGAATTAATCAAT-AGGAGGGGTGTCGCTCTTCCATCAGCAC AACCGTGCACCA  
Ae (AEc\_Mariner-8\_Sln) ----ACCAGAATTGATTAAC-AGAAAAGGTGTTGCTTCCATCATGACAACGCCAGACCA  
Si (Mariner-8\_SIn) ----ACCAGAAT TGATCAAC-AGAAAAGGTGTTGCTTCCATCATGACAACGCCAGACCA  
Bte (Mariner-1\_Bte) ----GCCAGAATTGGCAAAT-CGTAAGGGTGTGTTTTCCAGCATGATAATGCAAGGCC  
Am (AMe\_FAMAR1) ----GCCCGAATTGACAAAT-CGAAAAGGTGTTGTATTCCATCATGACAATGCAAGGCCA  
Fa (FAMAR1) ----GGCCGAATTGACAAAT-CGAAAAGGTGTTGTATTCCATCATGACAATGCAAGGCCA  
Hs (Mariner-2\_HSal) ----ACCAGAATTGGCAAAT-CGAAAAGGTATTGTGTTCCACCATGACAATGCAAGGCCA  
Hs (Mariner-42\_HSal) ----GCCAGAATTGGCAAAT-CGTAAGGAAT CGTGTTCCACCACGACAATGCGAGGCC  
Ac (Mariner-13\_ACe) ----GCCAGAGTTAGCGAAT-CGCAAAGGAATCGTCTTTCATCATGACAATGCAAGACCA  
Ae (AEVX01012963) ----GCCAGAGTTAGCGAAT-TGCAAAGGAATCGTCTTTCATCATGACGATGCAAGACCA  
Cc\_4 ----GCCATAATCACCACAT-CACATACGAATTGTGTTCCGATCATGATAATGCAAGGCCA  
Cc\_6 ----GCCATAATCGGCACAT-CACATACGAATTGTGTTCCGATCATGATAATGCAAGGCCA  
Cc\_5 ----GCCATAATGGCAAAT-CACATAGGAACTGTGTTCCGATCATGAT----CAAGGCCA  
Cc\_7 ----GCCATAATGGCAAAT-CACATAGGAACTGTGTTCCGATCATGAT----CAAGGCCA  
Cc (JX976920) ----GCCATAATGGCAAAT-CACATAGGAACTGTGTTCCGATCATGAT----CAAGGCCA  
Cc (JX976921) ----GCTAAAATGGAAAAAT-CGCTATAGAATTATGTTCCACCATGTTAAAGCAAGGCCA  
Cc (JX976922) ----GCTAAAATGGAAAAAT-CGCTATAGAATTGTGTTCCACCATGTTAAAGCAAGGCCA  
Cc (JX9723) ----GCTAAAATGGAAAAAT-CGCTATAGAATTGTGTTCCACCATGTTAAAGCAAGGCCA

Dm (JX976931) ----GCCAAATTTGGCAAAT-CGCAAAGGGAGTTGTGTTCCACCGTGATAATGCAAGGCCA  
 Ce (JX976927) ----ATCAGAATTGGCAAAT-CGCAAAGGAATTGTGTTCCACCATGATAATGCAAGGCCA  
 Dm (JX976935) ----ATCAGAATTGGCAAAT-CGCAAAGGAATTGTGTTCCACCATGATAATGCAAGGCCA  
 Ce (JX976926) ----ATCAGAATTGGCAAAT-CGCAAAGGAATTGTGTTCCACCATGATAATGCAAGGCCA  
 Ce (JX976924) ----ATCAGAATTGGCAAAT-CGCAAAGGAATTGTGTTCCACCATGATAATGCAAGGCCA  
 Ce (JX976925) ----ATCAGAATTGGCAAAT-CGCAAAGGAATTGTGTTCCACCATGATAATGCAAGGCCA  
 Hs (Mariner-36\_HSal) ----CCCAGAACTGGTGAAT-CGTAAAGATGTTGTCTTTCCACCATGACAACGCTAGACCA  
 Hs (Mariner-23\_HSal) ----GCCAGAATTGATAAAT-CGCAAAGGAGTGGTCTTCCATCATGACAACGCTCGACCA  
 Pb (Pba\_Mariner-23\_HSal) ----GCCAGAATTGATAAAT-CGCAAAGGAGTAGTATTCCAACATGACAACGCTCGACCA  
 Ca (Mariner\_CA) ----GCCAGAATTGATCAAT-CGTAAAGGTGTCATATTCCATCAGGACAACGCCAGACCA  
 Si (Mariner-24\_SIn) ----GCCAGAATTGATCAAT-AGAAAAGGTGTAGTGTTCACCAAGATAATGCGAGACCT  
 Sm (SMAR7) ----GCCAGAATTGATCAAT-AGAAAAGGTGTAGTGTTCACCAAGATAATGCGAGACCT  
 Af (Mariner-1\_AFl) ----ATCTGAATTAATTAAC-AGGAAAAGATGTAGTGTTCATCAGATAACGCTAGACCT  
 Hs (Mariner-11\_HSal) ----ACCAGAATTGGCGAAC-AGAAAAGGTGTTGTGTTTCATCATGACAACGCCAGACCT  
 Hs (Mariner-16\_HSal) ----GCCCGAATTGGCGAAC-AGAAAAGGCGTTGTGTTCCACCAAGGACAACGCTAGACCA  
 Der (Mariner-2\_DER) ----TCCAGAATTGGCCAAC-AGGAAGGGTGTAGTGTTCACCAAGGACAACGCCAGACCA  
 Hs (Mariner-26\_HSal) ----GCCAGAATTGGCCAAT-AGGAAGGGTGTGTTGTGTTCCATCAAGACAATGCCAGGCCG  
 Del (Mariner-2\_DEl) ----CCCCGCTTTGGCCAAT-AGGAAAAGGAATTGTTTTCCATCAGGACAACGCTAGACCA  
 Del (Mariner-1\_DEl) ----GCCATCTTTGATCAAC-AGAGGCCGAATTGTCTTCCATCAGGACAACGCCAGGCCA  
 Bt (Mariner-1\_BT) ----TCCGGAATTAGTCAAC-AGAAAACGCATAATCTTCCATCAGGATAACGCAAGACCG  
 Ac (Mariner-5\_ACe) ----TCCAGAAATAGCGAAT-CGGAAGGGCGTCTGTTTCATCAGGACAATGCGCGGCCT  
 Si (Mariner-28\_SIn) ----CCCAGAATTGGTGAAT-AGAAAAGGTGTTTTATTTCCATCAGGACAACGCCAGGCCCT

\* \* \* \*

Hs (Mariner-24\_SIn) CATACGTCATTGACCACTCGGAA-  
 Hs (Mariner-45\_HSal) CATACATCTTTAACGACCCGCTCAG  
 Cf (Mariner-6\_CFl) CATGCAAGTTTGCAGACTCGCCAA  
 Hs (Mariner-35\_HSal) CACGTATCTTTGGCAACCCGGCAA  
 Df (Mariner-1-DF) CACACATCTTTGGTCACTCGGCA-  
 Ac (Mariner-1\_ACe) CACACAAGTTTGGTCACTCGGC--  
 Lh (ADOQ01008024) CACACAAGTTTGGTCACTCGGC--  
 Lh (ADOQ01001582) CACACAAGTTTGGTCACTCGGC--  
 Dm (JX976930) CACACATCTTTGA-----  
 Dm (JX976937) CACACATCTTTGA-----  
 Dm (JX976938) CACACATCTTTGA-----  
 Ce (JX976929) CACACATCTTTGA-----  
 Dm (JX976934) CACACATCTTTGA-----  
 Ce (JX976928) CACACATCTTTGA-----  
 Dm (JX976936) CACACATCTTTGA-----  
 Mr (AFJA01006902) CACACAAGTTTGGTCAACCCGC---  
 Mr (AFJA01006736) CAGACGAGTGTGGTCAACCCGC---  
 Dm (JX976932) CACACATCTTTGA-----  
 Dm (JX976933) CACACATCTTTGA-----  
 Si (AEAQ01010279) TACATAAGTTTGTATCAC-----  
 Si (AEAQ01009575) CACACAATTTGATCAG-----  
 Cf (AEAB01001421) CACACATCTTTGGC-----  
 Cf (AEAB01018477) CACACATCTTTGGC-----  
 Ee (EEu\_Mariner\_Tbel) CACACAAGTTTGTATCACCTGT---  
 Pb (Pba\_Mariner\_Tbel) CACACAAGTTTGAACACCCGT---  
 Tb (Mariner\_Tbel) CACACAAGTTTGTATCACCCGT---  
 Hs (HSal\_Mariner\_Tbel) CACACAAGTTTGTATCACCCGT---  
 Hs (Mariner-22\_HSal) CACACATCTCTACAAACCCGGCAA  
 Ae (Mariner-16\_AEc) CACACATCTTTGATAACTCGGCAA  
 Ae (AEc\_Mariner-8\_SIn) CACACATCTTTGATGACGCGCCAA  
 Si (Mariner-8\_SIn) CACACATCTTTGATGACGCGCCAA  
 Bte (Mariner-1\_Bte) CACACATCTTTGGTCACTCGCCA-  
 Am (Ame\_FAMAR1) CACACATCTTTGGTCACTCGGCA-  
 Fa (FAMAR1) CACACATCTTTGGTCACTCGGCA-  
 Hs (Mariner-2\_HSal) CACACATCTTTGGTCACTCGGCA-  
 Hs (Mariner-42\_HSal) CACACATCTTTGACAACACGTAC-  
 Ac (Mariner-13\_ACe) TACACATCTTTGGCCACGCGGCA-  
 Ae (AEVX01012963) TACACATCTTTGGCCACGCGGCA-  
 Cc\_4 CACACATCTTTGTTGA-----  
 Cc\_6 CACACATCTTTGGA-----  
 Cc\_5 CACACATCTTTGTTGA-----

```

Cc_7          CACACATCTTTGTTGA-----
Cc (JX976920) CACACATCTTTGGA-----
Cc (JX976921) CACACATCTTTGTTG-----
Cc (JX976922) CACACATCTTTGGA-----
Cc (JX976923) CACACATCTTTGTTGA-----
Dm (JX976931) CACACATCTTTGCTTTG-----
Ce (JX976927) CACACATCTTTGGA-----
Dm (JX976935) CACACATCTTTGGA-----
Ce (JX976926) CACACATCTTTGTTGA-----
Ce (JX976924) CACACATCTTTGGA-----
Ce (JX976925) CACACATCTTTGTTGA-----
Hs (Mariner-36_HSal) CATACATCGTTGGTCACCCGCCA-
Hs (Mariner-23_HSal) CACACAAGTTTGATGACTCGCG--
Pb (Pba_Mariner-23_HSal) CATACAAGTTTGATGACTCGCA--
Ca (Mariner_CA) CACACATCTTTGATGACCCGCCA-
Si (Mariner-24_SIn) CATACAAGTTTGGTAACTCGTCA-
Sm (SMAR7) CATACAAGTTTGGTAACTCGCCA-
Af (Mariner-1_AFl) CACACGAGTTTAAATGACTCGCCA-
Hs (Mariner-11_HSal) CACACAAGTTTAAATGACTCGCCA-
Hs (Mariner-16_HSal) CACGTTTCTCTGATGACCCGGCAA
Der (Mariner-2_DEr) CACACTTCGTTGATGACTCGTCAG
Hs (Mariner-26_HSal) CACACATCTTTGACGACGCGCCAG
Del (Mariner-2_DEl) CACACGTCAATAGCGACTCGCCAG
Del (Mariner-1_DEl) CACACATCTTTAGTGACGCGCCAG
Bt (Mariner-1_BT) CATGTTTCTTTGATGACCAGGCAA
Ac (Mariner-5_ACe) CATGTGTCTTTGATAAATCGACA-
Si (Mariner-28_SIn) CATGTTTCTTTAACCACCCGGAA-

```
