# Supplementary material for: Chromosomal organization and evolutionary history of Mariner transposable elements in Scarabaeinae coleopterans
Source: PubMed Central journal article supplement (PMC3906913; doi:10.1186/1755-8166-6-54), 2013-11-29

**Additional File 3: Figure S2** - Alignment guide tree of *Mariner* families based on Maximum Likelihood. The taxa are the same as described in Figure 3. The bootstrap support values are indicated on the nodes. The scale bar indicates the genetic distance.

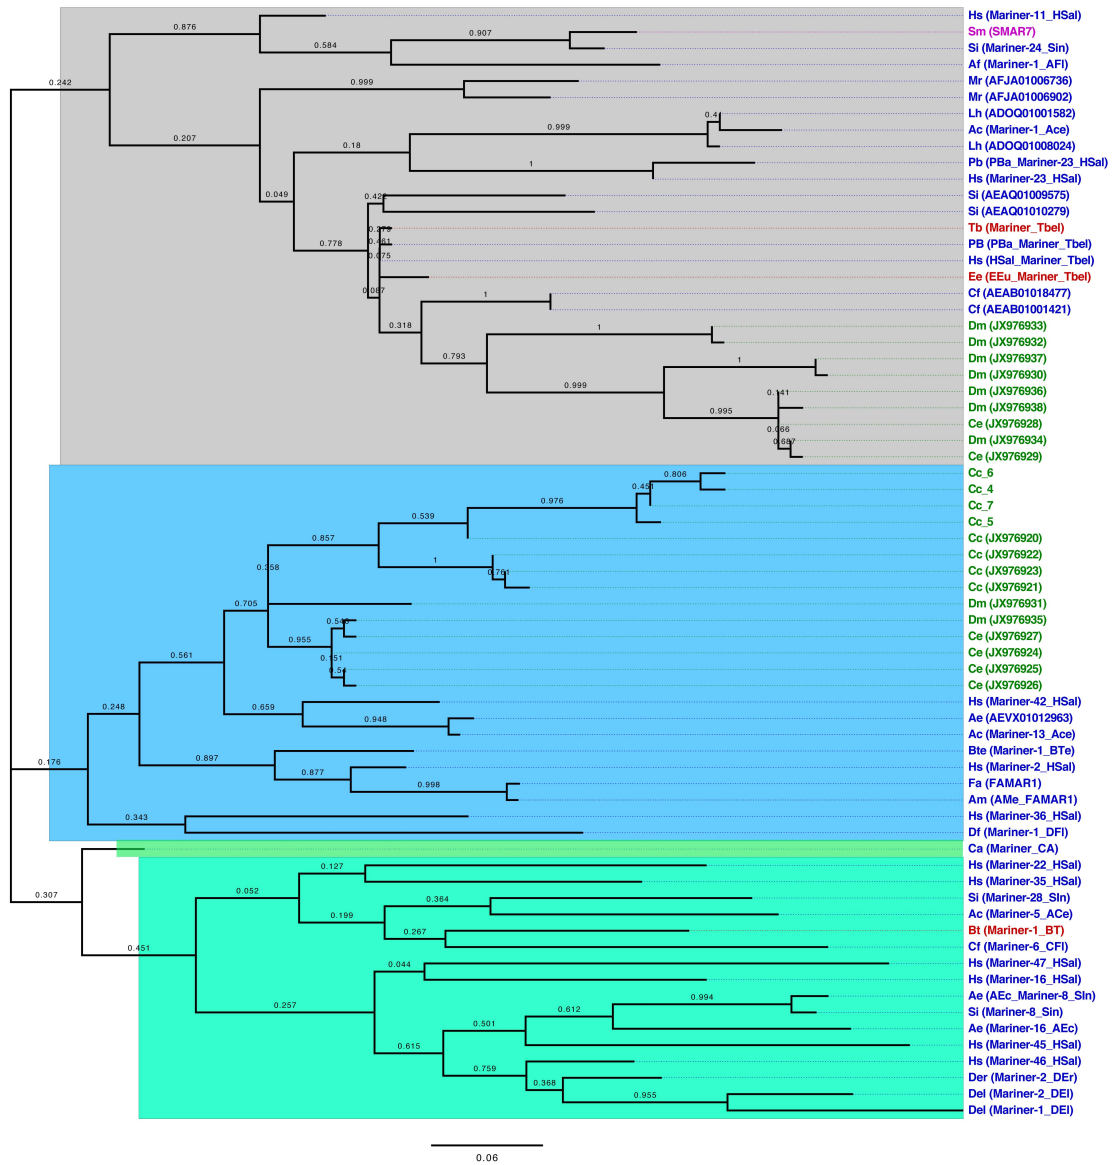

Supplement: 1755-8166-6-54-S3.pdf [file 1755-8166-6-54-S3.pdf]
